1

## **Pervasiveness of exoribonuclease-resistant RNAs in plant viruses suggests new roles for these conserved RNA structures**

*Anna-Lena Steckelberg<sup>&</sup>, Quentin Vicens<sup>&\*</sup>, and Jeffrey S. Kieft<sup>\*</sup>*

Department of Biochemistry and Molecular Genetics, and RNA BioScience Initiative, University of Colorado Denver School of Medicine, Aurora, CO 80045, USA.

[anna-lena.steckelberg@ucdenver.edu](mailto:anna-lena.steckelberg@ucdenver.edu); [quentin.vicens@ucdenver.edu](mailto:quentin.vicens@ucdenver.edu); [jeffrey.kieft@ucdenver.edu](mailto:jeffrey.kieft@ucdenver.edu)

<sup>&</sup>these authors contributed equally to this work

<sup>\*</sup>corresponding authors

1 **ABSTRACT**

2 Exoribonuclease-resistant RNAs (xrRNAs) are discrete folded RNA elements that block the processive  
3 degradation of RNA by exoribonucleases. xrRNAs found in the 3' untranslated regions (UTRs) of animal-  
4 infecting flaviviruses and in all three members of the plant-infecting *Dianthovirus* adopt a complex ring-  
5 like fold that blocks the exoribonuclease; this ability gives rise to viral non-coding subgenomic RNAs.  
6 The degree to which these folded RNA elements exist in other viruses and in diverse contexts has been  
7 unclear. Using computational tools and biochemical assays, we discovered that xrRNA elements are  
8 widely found in viruses belonging to the *Tombusviridae* and *Luteoviridae* families of plant-infecting RNA  
9 viruses, demonstrating their importance and widespread utility. Unexpectedly, many xrRNAs are located  
10 in intergenic regions rather than in the 3'UTR and some are associated with the 5' ends of subgenomic  
11 RNAs with protein-coding potential, suggesting that xrRNAs with similar scaffolds are involved in the  
12 maturation or maintenance of diverse subgenomic RNAs, not just the ones generated from the 3'UTR.

## 13 INTRODUCTION

14 During infection, positive-sense RNA viruses produce full-length genomic RNA and many  
15 produce subgenomic RNAs (sgRNA) that can encode viral proteins or act as “riboregulators” that interact  
16 with and influence the cellular and viral machinery to benefit viral infection <sup>1-6</sup>. Most viral sgRNAs are  
17 thought to be produced directly through transcription; however, recent discoveries show that some  
18 noncoding viral sgRNAs result from discrete RNA elements that block the progression of 5' to  
19 3' exoribonucleases (Figure 1) <sup>7-15</sup>. Discrete, compactly-folded exoribonuclease-resistant RNA (xrRNA)  
20 elements were first identified in mosquito-borne flaviviruses (e.g. Dengue virus, Zika virus, West Nile  
21 virus), where they protect the genome's 3' untranslated region (UTR) from degradation <sup>8</sup>. The resultant  
22 decay intermediates accumulate and comprise biologically active viral non-coding sgRNAs (Figure 1)  
23 <sup>8,9,12,16-21</sup>.

24  
25 Extensive functional and high-resolution structural studies show that mosquito-borne flaviviral  
26 xrRNA (xrRNA<sub>F</sub>) function is conferred by a specific three-dimensional fold containing an interwoven  
27 pseudoknot stabilized by extensive conserved secondary and tertiary interactions; this creates an unusual  
28 ring-like conformation that protectively wraps around the 5' end of the RNA structure <sup>22,23</sup>. xrRNAs are  
29 found broadly within flaviviruses including those that are tick-borne, are specific to insects, or have no  
30 known vector <sup>15,24,25</sup>. Comparison of diverse xrRNA<sub>F</sub> sequences revealed two classes; class I (xrRNA<sub>F1</sub>) is  
31 exemplified by mosquito-borne flaviviruses while class II (xrRNA<sub>F2</sub>) is found in diverse flaviviruses <sup>25</sup>.  
32 Although aligned xrRNA<sub>F2</sub> sequences show patterns, their three-dimensional structures are unknown, as  
33 are the structures of recently reported xrRNAs from most other viral clades <sup>7,13</sup>.

34  
35 Recently, we structurally and functionally characterized xrRNAs from the 3'UTRs of  
36 dianthoviruses, plant-infecting positive-sense RNA viruses in the *Tombusviridae* family; similar to the  
37 xrRNA<sub>F</sub>, they function to produce a non-coding RNA derived from the viral 3'UTR <sup>10,26</sup>. Dianthoviral

38 xrRNAs (xrRNA<sub>D</sub>) also rely on a pseudoknot that forms a protective ring-like structure<sup>26</sup>, but they have  
39 very different sequences and secondary structures compared to xrRNA<sub>F1</sub> and the ring is formed by a  
40 different set of interactions (Figure 1). Although xrRNA<sub>F</sub> elements pervade the flaviviruses with  
41 associated sequence and structural diversity, xrRNA<sub>D</sub> have only been identified in the three closely related  
42 members of the *Dianthovirus* genus. This raises the question of whether xrRNAs similar to xrRNA<sub>D</sub> are  
43 more widespread and diverse than currently known, and thus if they may be an underappreciated way to  
44 produce or protect viral RNAs. Moreover, the only available xrRNA<sub>D</sub> crystal structure is in an “open”  
45 conformation that likely represents a necessary folding intermediate before the pseudoknot forms<sup>26</sup>  
46 (Figure 1). Thus, we still do not know the full repertoire of secondary and tertiary interactions required to  
47 form and stabilize the exoribonuclease-resistant pseudoknot state of xrRNA<sub>D</sub>. The lack of diverse  
48 xrRNA<sub>D</sub> sequences prevents conclusions about the role, prevalence, and structural diversity of this fold.  
49

50 To begin to address these questions, we used a bioinformatic approach to identify more xrRNA<sub>D</sub>  
51 sequences among plant viruses, identifying over 40 putative new xrRNA<sub>D</sub>-like elements in viruses  
52 belonging to the *Tombusviridae* and *Luteoviridae* families. *In vitro* assays show that these elements are  
53 indeed resistant to Xrn1 and analysis of these new xrRNAs reveals both conservation and variability.  
54 Furthermore, the genomic location of these new xrRNAs suggests new roles in the generation of sgRNA  
55 species that have protein-coding potential, providing evidence that xrRNA-based RNA maturation  
56 pathways may be more widespread than previously anticipated.

## 57 **RESULTS AND DISCUSSION**

58 To search for xrRNA<sub>D</sub>-like elements, we used the *Infernal* software (Eddy lab), which enables  
59 screening of massive datasets of DNA sequences for conserved structure patterns with poor sequence  
60 conservation<sup>27</sup>. Because the *Dianthovirus* genus only comprises three members (Red clover necrotic  
61 mosaic virus (RCNMV), Sweet clover necrotic mosaic virus (SCNMV), and Carnation ringspot virus

62 (CRSV))<sup>26</sup>, we expanded our search to other plant-infecting positive-sense RNA viruses. The initial  
63 search within a library of viral reference genomes (see Methods) identified two potential sequences  
64 among *Luteoviridae*; *Poleroviruses*: wheat leaf yellowing-associated virus isolate JN-U3 (GenBank ID #  
65 NC\_035451; Infernal E-value = 0.00025, score = 44.3) and sugarcane yellow leaf virus (GenBank  
66 #NC\_000874; Infernal E-value = 6.5, score = 24.2). With these sequences added to the alignment,  
67 subsequent searches identified > 40 candidates within the public repository of all available sequences for  
68 *Tombusviridae* and *Luteoviridae*, demonstrating how powerful this tool is for computationally identifying  
69 functional elements in viral RNAs<sup>28</sup>.

71 Alignment of the putative xrRNA<sub>D</sub>-like elements revealed that their predicted secondary structures  
72 contain conserved helices P1, P2, and the pseudoknot, which are supported by covariation but have little  
73 sequence conservation (R-scape<sup>29</sup> E-values for the 12 covarying base pairs in the stems and the  
74 pseudoknot are within  $3 \cdot 10^{-4}$ – $8 \cdot 10^{-13}$  (95<sup>th</sup> percentile =  $1 \cdot 10^{-12}$ ); Figure 2A). L1 and L2B are > 97%  
75 conserved in sequence. In the case of L1 and L2B, this is consistent with their role in creating a specific  
76 folded motif that promotes pseudoknot formation<sup>26</sup>. Also, two of the three nucleotides immediately  
77 upstream of the 3' side of the pseudoknot are >97% conserved, but their role is not obvious from the  
78 crystal structure of the open state. Likewise, the non-Watson-Crick A8-G33 base pair identified in the  
79 crystal structure (Figure 1) cannot be reconciled with the predominant presence of G at position 8 and  
80 G/A at position 33 in all the other sequences. These observations support the previous assertion that the  
81 crystallized open state represents a folding intermediate and that structural adjustments and additional  
82 interactions are present in the “closed” pseudoknot state.

83  
84 Viruses with putative novel xrRNAs include members of the *Machlomovirus* and *Umbravirus*  
85 genera of the *Tombusviridae* family, as well as members of the *Polerovirus* and *Enamovirus* genera of the  
86 *Luteoviridae* family. To experimentally determine if these are authentic xrRNAs, we tested representative

87 sequences from viruses of both families using our established *in vitro* Xrn1 resistance assay <sup>11</sup>.  
88 Specifically, *in vitro*-transcribed and purified RNA sequences from opium poppy mosaic virus (OPMV),  
89 Maize chlorotic mottle virus (MCMV), Potato leafroll virus (PLRV) Maize yellow dwarf virus-RMV  
90 (MYDV-RMV) and Hubei polero-like virus 1 (HuPLV1) were challenged with recombinant Xrn1. All  
91 RNAs stopped Xrn1 degradation similarly to RCNMV xrRNA<sub>D</sub> (Figure 3A, B), demonstrating that they  
92 are authentic xrRNAs and do not require additional *trans*-acting proteins for function. Moreover,  
93 mutations to disrupt the putative pseudoknot in the MCMV, PLRV and HuPLV1 xrRNAs abolished Xrn1  
94 resistance, while compensatory mutations that restore pseudoknot base pairing rescued the activity  
95 (Figure 3C-E). In addition, the mapped Xrn1 stop site is at the base of P1 in all newly identified xrRNAs,  
96 matching the xrRNA<sub>D</sub> stop site (Figure 3F-H, Supplementary Figure S2). Overall, the conserved  
97 secondary structure (Figure 2B), the location of the exoribonuclease halt site, and the strict dependence on  
98 the pseudoknot for Xrn1 resistance suggest that these newly-identified xrRNAs use a similar molecular  
99 fold and mechanism as the xrRNA<sub>D</sub>, thus we classify them as such, and hereafter refer to the class as  
100 xrRNA<sub>TL</sub> (for *Tombusviridae* and *Luteoviridae*).

101

102 A notable structural difference between diverse xrRNA<sub>TL</sub> elements is that a subset of xrRNAs  
103 found in the *Tombusviridae* family (RCNMV, SCNMV, CRSV, OPMV, MCMV) possess a P3 stem-loop  
104 immediately downstream of the pseudoknot (Figure 2A; Tables 1 and S1). We previously showed that  
105 this part of the sequence is not required for Xrn1 resistance by xrRNA<sub>TL</sub> *in vitro* <sup>26</sup>. Consistent with this,  
106 an analogous stem-loop (P4) found in xrRNA<sub>F1</sub> is also dispensable *in vitro*; the crystal structure indicates  
107 it may stabilize the pseudoknot through stacking interactions (Figure 1) <sup>22</sup>. Thus, in xrRNA<sub>TL</sub> coaxial  
108 stacking of P3 on P1/P2 could help to stabilize the RNA structure in the cellular context during infection.

109

110 The location of the new xrRNAs reveals unexpected variation (Figure 4). Only two of the newly  
111 identified xrRNAs are in the 3'UTR of the viral genome (Table 1), as are the previously characterized

112 dianthoviral xrRNA<sub>TL</sub> and xrRNA<sub>F1-F2</sub>. In MCMV, the first nucleotide of the P1 helix matches the 5' end  
113 of sgRNA2<sup>30</sup>, thus this new xrRNA element probably blocks Xrn1 to generate non-coding sgRNAs  
114 derived from the 3'UTR, as with the dianthoviruses, flaviviruses, and other xrRNAs. However, for some  
115 members of the *Tombusviridae* family as well as for *Poleroviruses*, xrRNA<sub>TL</sub> is located in an intergenic  
116 region, within 5–20 nt from the translation start site of ORF3a, and ~ 135 nt from the start site of a  
117 readthrough protein encoded by ORF3-5 (our data suggest that ORF3a has not been annotated for all  
118 *Poleroviruses*; Table S1). ORF3a codes for protein P3a, which is essential for long-distance movement of  
119 the virus in plants<sup>31</sup>. Translation of ORF3a occurs from sgRNA1, generally at a non-AUG codon (Tables  
120 1 and S1)<sup>31-33</sup>. This implies that these xrRNAs, rather than functioning in non-coding RNA production,  
121 act to produce or maintain protein coding RNAs (Figure 4); sgRNAs could be produced from full-length  
122 genomic RNAs without requiring a subgenomic promoter, or sgRNAs produced by other means could be  
123 protected from 5' to 3' degradation. Since the *Tombusviridae* and *Luteoviridae* families use 3' proximal  
124 cap-independent translation enhancers (3'-CITEs) to initiate translation, uncapped sgRNAs with xrRNAs  
125 on their 5' ends could still be translationally active<sup>34,35</sup>. Thus, these xrRNAs could be part of complex  
126 translation regulation mechanisms involving these 3'-CITEs and different sgRNAs<sup>36</sup>.

127

128

129 Various roles for xrRNAs are possible, depending on their genetic context. The presence of  
130 xrRNAs in diverse locations within viral genomes suggests that new xrRNA scaffolds may emerge from  
131 analyzing sgRNA 5' termini from other viruses, as certainly not all xrRNA elements were identified by  
132 the algorithm used here<sup>5,7,37</sup>. Intriguing candidates for novel xrRNA identification are viruses in which no  
133 obvious promoter elements for sgRNA production were identified, or viruses in which putative promoter  
134 sequences are downstream of the sgRNA 5' end<sup>1,5,30,37</sup>. Many questions remain that pertain to  
135 understanding the structural/sequence requirements for Xrn1 resistance, the degree to which structural  
136 variation is tolerated, and how sequence diversity is integrated into similar folds<sup>38</sup>. The now-expanded set

137 of xrRNA<sub>TL</sub> candidates provides a broader phylogeny for future bioinformatic and structural studies that  
138 will address these points.

139





180 correspond to positive hits but with a larger sequence or structure variation. By the time the alignment  
181 reached a size of 10–12 sequences, we were able to retrieve most of the sequences that made it into the  
182 final alignment through further iterations of *Infernal* searches and manual addition to the alignment. Hits  
183 for unclassified viruses were also retrieved from large-scale transcriptomics data of invertebrate and  
184 vertebrate-associated RNA viruses, using the deposited sequences<sup>40,41</sup>.

185 A statistical validation of the final proposed alignment of 47 sequences was performed using the latest  
186 version of R-scape available at <http://eddylab.org/R-scape/><sup>29</sup> (last accessed on August 17, 2018). The  
187 corresponding conserved structure and sequence patterns were rendered using R2R v. 1.0.5<sup>42</sup>.

188

189 **Design of RNAs for *in vitro* assays.** DNA templates for *in vitro* transcription were gBlocks ordered from  
190 IDT, cloned into pUC19 and verified by sequencing. RNA constructs for Xrn1 degradation assays  
191 contained the xrRNA sequence plus ~30 nucleotides of the endogenous upstream sequence (‘leader  
192 sequence’) to allow loading of the exoribonucleases. Below are the sequences used in *in vitro* Xrn1  
193 degradation assays with the T7 promoter underlined, the leader sequence in *italic* and the first protected  
194 nucleotides (experimentally validated as described below) in bold. Lower case letters indicate extra  
195 nucleotides inserted to allow better transcription.

196 **OPMV xrRNA:**

197 TAATACGACTCACTATA*GGAATTGCCTCCACCAGTAACTAAACCCA***ACCACAGCCAAGCATTAA**  
198 **GTTGCAAGCGTTGGAGTGGCAGGCTTAACGTCCGACAGTACGACA**ACTGCGG

199 **MCMV xrRNA:**

200 TAATACGACTCACTATA*GGTTCAGGCCAGGGCTGGCAAATCATTGAGCACAAGGTGAGCCG*  
201 **GCATGAGGTTGCAAGACCGGAACAACCAGTCCTTCTGGCAGAGTCCTGCCAA**

202 **PLRV xrRNA:**

203 TAATACGACTCACTATAgGCCACCACAAAAGAACACTGAAGGAGCTCACTAAAAGCTAGCCAAGC  
204 ATACACGAGTTGCAAGCATTGGAAGTTCAAGCCTCGT

205 **MYDV-RMV xrRNA:**

206 TAATACGACTCACTATAgGTCCAGAAACAAAAAGTTTAAAACAGAAAGCTCTCAAGTCAGCCAGGC  
207 AAATTCGAGTTGCAAGCACTGGATGACCTAGTCTCGATA

208 **HuPLV1 xrRNA:**

209 TAATACGACTCACTATAgGCCACAAAACGAATAAAGGAAGAACGCACGAGAGTCAGCCAAACA  
210 AACACAAGTTGCAAGTGTTGGAGACTCATTCTAGTCTTGT

211

212 **RNA preparation.** DNA templates for *in vitro* transcription were amplified by PCR using custom DNA  
213 primers (IDT) and Phusion Hot Start polymerase (New England BioLabs). 2.5 mL transcription reactions  
214 were assembled using 1000 µL PCR reactions as template (~0.2 µM template DNA), 6 mM each NTP, 60  
215 mM MgCl<sub>2</sub>, 30 mM Tris pH 8.0, 10 mM DTT, 0.1% spermidine, 0.1% Triton X-100, T7 RNA  
216 polymerase and 2 µL RNasin RNase inhibitor (Promega) and incubated overnight at 37°C. After  
217 inorganic pyrophosphates were precipitated by centrifugation, the reactions were ethanol precipitated and  
218 purified on a 7 M urea 8% denaturing polyacrylamide gel. RNAs of the correct size were gel-excised,  
219 eluted overnight at 4°C into ~40 mL of diethylpyrocarbonate (DEPC)-treated milli-Q filtered water  
220 (Millipore) and concentrated using Amicon Ultra spin concentrators (Millipore). Mutations were  
221 introduced using mutagenized custom DNA reverse primers.

222 **Primers used in this study (mutated residues in bold):**

223 OPMV\_WT\_rev  
224 5'-CCGCAGTTGTCGTA**CT**GTCGG-3'

225 OPMV\_PKmut1\_rev  
226 5'-CCGCAGTTGTCGTA**CT**GTCGGACGA**ATT**GCCTGCCACTCCAACGC-3'

227 OPMV\_PKmut2\_rev  
228 5'-CCGCAGTTGTCGTA CTGTTCGGACGTTAAGCCTGCCACTCCAACGCTTGCAACAATTTGCTT  
229 GGCTGTGGTTGG-3'

230 OPMV\_PKcomp\_rev  
231 5'-CCGCAGTTGTCGTA CTGTTCGGACGAATTGCCTGCCACTCCAACGCTTGCAACAATTTGCTT  
232 GGCTGTGGTTGG-3'

233 MCMV\_WT\_rev  
234 5'-TGGCAGGACTCTGCCAGAAGG-3'

235 MCMV\_PKmut1\_rev  
236 5'-TGGCAGGACTCTGCCAGCTCCACTGGTTGTTCCGGTCTTGC-3'

237 MCMV\_PKmut2\_rev  
238 5'-TGGCAGGACTCTGCCAGAAGGACTGGTTGTTCCGGTCTTGCAAGGAGATGCCGGCTCACC  
239 TTGTGCTC-3'

240 MCMV\_PKcomp\_rev  
241 5'-TGGCAGGACTCTGCCAGCTCCACTGGTTGTTCCGGTCTTGCAAGGAGATGCCGGCTCACC  
242 TTGTGCTC-3'

243 PLRV\_WT\_rev  
244 5'-ACGAGGCTTGA ACTTCCAATGC-3'

245 PLRV\_PKmut1\_rev  
246 5'-TGCTGGCTTGA ACTTCCAATGCTTGC-3'

247 PLRV\_PKmut2\_rev  
248 5'-ACGAGGCTTGA ACTTCCAATGCTTGAACAGCAGTATGCTTGGCTAGTTTTAGTG-3'

249 PLRV\_PKcomp\_rev  
250 5'-TGCTGGCTTGA ACTTCCAATGCTTGAACAGCAGTATGCTTGGCTAGTTTTAGTG-3'

251 MYDV-RMV\_WT\_rev  
252 5'-TATCGAGACTAGGTCATCCAGTGC-3'

253 huPLV\_WT\_rev  
254 5'-ACAAGACTAGAATGAGTCTCC-3'

255 huPLV\_PKmut1\_rev  
256 5'-TGTTGACTAGAATGAGTCTCCAACACTTGC-3'

257 huPLV\_PKmut2\_rev  
258 5'-ACAAGACTAGAATGAGTCTCCAACACTTGCAACAACAGTTTGTGGCTGACTCTCG-3'

259 huPLV\_PKcomp\_rev  
260 5'-TGTTGACTAGAATGAGTCTCCAACACTTGCAACAACAGTTTGTGGCTGACTCTCG-3'

261 ***In vitro* Xrn1 resistance assays.** 4 µg RNA was resuspended in 40 µL 100 mM NaCl, 10 mM MgCl<sub>2</sub>, 50  
262 mM Tris pH 7.5, 1 mM DTT and re-folded at 90°C for 3 minutes then 20°C for 5 minutes. 3 µL  
263 recombinant RppH (0.5 µg/µL stock) was added and the samples were split into two 20 µL reactions (-/+

264 exoribonuclease). 1  $\mu$ L of the recombinant Xrn1 (0.8  $\mu$ g/ $\mu$ L stock) was added where indicated. All  
265 reactions were incubated for 2 hrs at 30°C using a thermocycler. The degradation reactions were resolved  
266 on a 7 M urea 8% denaturing polyacrylamide gel and stained with ethidium bromide.

267

268 **Mapping of the exoribonuclease halt site.** To determine the Xrn1 stop site at single-nucleotide  
269 resolution, 30  $\mu$ g *in vitro*-transcribed RNA was degraded using recombinant RppH and Xrn1 as described  
270 above (the reaction volume was scaled up to 300  $\mu$ L, and 20  $\mu$ L of each enzyme was used). The  
271 degradation reaction was resolved on a 7 M urea 8% polyacrylamide gel, then the Xrn1-resistant  
272 degradation product was cut from the gel and eluted overnight at 4°C into ~20 mL of  
273 diethylpyrocarbonate (DEPC)-treated milli-Q filtered water (Millipore) and concentrated using Amicon  
274 Ultra spin concentrators (Millipore). Once recovered, the RNA was reverse-transcribed using Superscript  
275 III reverse transcriptase (Thermo) and a 6-FAM (6-fluorescein amidite)-labeled sequence-specific reverse  
276 primer (IDT) with an (A)<sub>20</sub> -stretch at the 5' end to allow cDNA purification with oligo(dT) beads. 10  $\mu$ L  
277 RT reactions contained 1.2 pM RNA, 0.25  $\mu$ L 0.25  $\mu$ M FAM-labeled reverse primer, 1  $\mu$ L 5x First-Strand  
278 buffer, 0.25  $\mu$ L 0.1 M DTT, 0.4  $\mu$ L 10 mM dNTP mix, 0.1  $\mu$ L Superscript III reverse transcriptase (200  
279 U/ $\mu$ L) and were incubated for 1 hour at 50°C. To hydrolyze the RNA template after reverse transcription,  
280 5  $\mu$ L of 0.4 M NaOH was added and the reaction mix incubated at 90°C for 3 min, followed by cooling  
281 on ice for 3 min. The reaction was neutralized by adding 5  $\mu$ L of acid quench mix (1.4 M NaCl, 0.57 M  
282 HCl, 1.3 M sodium acetate pH 5.2), then 1.5  $\mu$ L oligo(dT) beads (Poly(A)Purist MAG Kit (Thermo))  
283 were added and the cDNA purified on a magnetic stand according to the manufacturer's instructions. The  
284 cDNA was eluted in 11  $\mu$ L ROX-HiDi and analyzed on a 3500 Genetic Analyzer (Applied Biosystems)  
285 for capillary electrophoresis. A Sanger sequencing (ddNTP) ladder of the undigested RNA was analyzed  
286 alongside each degradation product as reference for band annotation.

287 **CONTRIBUTIONS**

288 Q.V., A.-L.S., J.S.K. designed and analyzed research; Q.V. performed the computational search; A.-L.S.  
289 performed the biochemical experiments; Q.V., A.-L.S. & J.S.K wrote the paper.

290 **ACKNOWLEDGEMENTS**

291 We gratefully acknowledge David Farrell for IT support; the Kieft lab members for useful discussions;  
292 and W. Allen Miller and David Costantino for careful reading of the manuscript.

293 **FINANCIAL SUPPORT**

294 This work was supported by NIH grants R35GM118070 and R01AI133348 (J.S.K.) and DFG STE  
295 2509/2-1 (A.-L.S.).

296

## 297 REFERENCES

- 298 1 Miller, W. A., Shen, R., Staplin, W. & Kanodia, P. Noncoding RNAs of Plant Viruses and  
299 Viroids: Sponges of Host Translation and RNA Interference Machinery. *Mol Plant Microbe*  
300 *Interact* **29**, 156-164, doi:10.1094/MPMI-10-15-0226-FI (2016).
- 301 2 Sztuba-Solińska, J., Stollar, V. & Bujarski, J. J. Subgenomic messenger RNAs: mastering  
302 regulation of (+)-strand RNA virus life cycle. *Virology* **412**, 245-255,  
303 doi:10.1016/j.virol.2011.02.007 (2011).
- 304 3 Miller, W. A. & Koev, G. Synthesis of subgenomic RNAs by positive-strand RNA viruses.  
305 *Virology* **273**, 1-8, doi:10.1006/viro.2000.0421 (2000).
- 306 4 Jiwan, S. D. & White, K. A. Subgenomic mRNA transcription in Tombusviridae. *RNA Biol* **8**,  
307 287-294 (2011).
- 308 5 Koev, G. & Miller, W. A. A positive-strand RNA virus with three very different subgenomic RNA  
309 promoters. *J Virol* **74**, 5988-5996 (2000).
- 310 6 Shen, R. & Miller, W. A. Subgenomic RNA as a riboregulator: negative regulation of RNA  
311 replication by Barley yellow dwarf virus subgenomic RNA 2. *Virology* **327**, 196-205,  
312 doi:10.1016/j.virol.2004.06.025 (2004).
- 313 7 Flobinus, A. *et al.* Beet Necrotic Yellow Vein Virus Noncoding RNA Production Depends on a 5'-  
314 ->3' Xrn Exoribonuclease Activity. *Viruses* **10**, doi:10.3390/v10030137 (2018).
- 315 8 Pijlman, G. P. *et al.* A highly structured, nuclease-resistant, noncoding RNA produced by  
316 flaviviruses is required for pathogenicity. *Cell Host Microbe* **4**, 579-591,  
317 doi:10.1016/j.chom.2008.10.007 (2008).
- 318 9 Roby, J. A., Pijlman, G. P., Wilusz, J. & Khromykh, A. A. Noncoding subgenomic flavivirus  
319 RNA: multiple functions in West Nile virus pathogenesis and modulation of host responses.  
320 *Viruses* **6**, 404-427, doi:10.3390/v6020404 (2014).
- 321 10 Iwakawa, H. O. *et al.* A viral noncoding RNA generated by cis-element-mediated protection  
322 against 5'->3' RNA decay represses both cap-independent and cap-dependent translation. *J Virol*  
323 **82**, 10162-10174, doi:10.1128/JVI.01027-08 (2008).
- 324 11 Chapman, E. G., Moon, S. L., Wilusz, J. & Kieft, J. S. RNA structures that resist degradation by  
325 Xrn1 produce a pathogenic Dengue virus RNA. *Elife* **3**, e01892, doi:10.7554/eLife.01892 (2014).
- 326 12 Moon, S. L. *et al.* A noncoding RNA produced by arthropod-borne flaviviruses inhibits the  
327 cellular exoribonuclease XRN1 and alters host mRNA stability. *RNA* **18**, 2029-2040,  
328 doi:10.1261/rna.034330.112 (2012).
- 329 13 Charley, P. A., Wilusz, C. J. & Wilusz, J. Identification of phlebovirus and arenavirus RNA  
330 sequences that stall and repress the exoribonuclease XRN1. *J Biol Chem* **293**, 285-295,  
331 doi:10.1074/jbc.M117.805796 (2018).
- 332 14 Clarke, B. D., Roby, J. A., Slonchak, A. & Khromykh, A. A. Functional non-coding RNAs  
333 derived from the flavivirus 3' untranslated region. *Virus Res* **206**, 53-61,  
334 doi:10.1016/j.virusres.2015.01.026 (2015).
- 335 15 Schnettler, E. *et al.* Induction and suppression of tick cell antiviral RNAi responses by tick-borne  
336 flaviviruses. *Nucleic Acids Res* **42**, 9436-9446, doi:10.1093/nar/gku657 (2014).
- 337 16 Schnettler, E. *et al.* Noncoding flavivirus RNA displays RNA interference suppressor activity in  
338 insect and Mammalian cells. *J Virol* **86**, 13486-13500, doi:10.1128/JVI.01104-12 (2012).
- 339 17 Göertz, G. P. *et al.* Noncoding Subgenomic Flavivirus RNA Is Processed by the Mosquito RNA  
340 Interference Machinery and Determines West Nile Virus Transmission by *Culex pipiens*  
341 Mosquitoes. *J Virol* **90**, 10145-10159, doi:10.1128/JVI.00930-16 (2016).
- 342 18 Schuessler, A. *et al.* West Nile virus noncoding subgenomic RNA contributes to viral evasion of  
343 the type I interferon-mediated antiviral response. *J Virol* **86**, 5708-5718, doi:10.1128/JVI.00207-  
344 12 (2012).

- 345 19 Bidet, K., Dadlani, D. & Garcia-Blanco, M. A. G3BP1, G3BP2 and CAPRIN1 are required for  
346 translation of interferon stimulated mRNAs and are targeted by a dengue virus non-coding RNA.  
347 *PLoS Pathog* **10**, e1004242, doi:10.1371/journal.ppat.1004242 (2014).
- 348 20 Liu, Y., Liu, H., Zou, J., Zhang, B. & Yuan, Z. Dengue virus subgenomic RNA induces apoptosis  
349 through the Bcl-2-mediated PI3k/Akt signaling pathway. *Virology* **448**, 15-25,  
350 doi:10.1016/j.virol.2013.09.016 (2014).
- 351 21 Manokaran, G. *et al.* Dengue subgenomic RNA binds TRIM25 to inhibit interferon expression for  
352 epidemiological fitness. *Science* **350**, 217-221, doi:10.1126/science.aab3369 (2015).
- 353 22 Akiyama, B. M. *et al.* Zika virus produces noncoding RNAs using a multi-pseudoknot structure  
354 that confounds a cellular exonuclease. *Science* **354**, 1148-1152, doi:10.1126/science.aah3963  
355 (2016).
- 356 23 Chapman, E. G. *et al.* The structural basis of pathogenic subgenomic flavivirus RNA (sfRNA)  
357 production. *Science* **344**, 307-310, doi:10.1126/science.1250897 (2014).
- 358 24 Funk, A. *et al.* RNA structures required for production of subgenomic flavivirus RNA. *J Virol* **84**,  
359 11407-11417, doi:10.1128/JVI.01159-10 (2010).
- 360 25 MacFadden, A. *et al.* Mechanism and structural diversity of exoribonuclease-resistant RNA  
361 structures in flaviviral RNAs. *Nat Commun* **9**, 119, doi:10.1038/s41467-017-02604-y (2018).
- 362 26 Steckelberg, A. L. *et al.* A folded viral noncoding RNA blocks host cell exoribonucleases through  
363 a conformationally dynamic RNA structure. *Proc Natl Acad Sci U S A* **115**, 6404-6409,  
364 doi:10.1073/pnas.1802429115 (2018).
- 365 27 Nawrocki, E. P. & Eddy, S. R. Computational identification of functional RNA homologs in  
366 metagenomic data. *RNA Biol* **10**, 1170-1179, doi:10.4161/rna.25038 (2013).
- 367 28 Lim, C. S. & Brown, C. M. Know Your Enemy: Successful Bioinformatic Approaches to Predict  
368 Functional RNA Structures in Viral RNAs. *Front Microbiol* **8**, 2582,  
369 doi:10.3389/fmicb.2017.02582 (2017).
- 370 29 Rivas, E., Clements, J. & Eddy, S. R. A statistical test for conserved RNA structure shows lack of  
371 evidence for structure in lncRNAs. *Nat Methods* **14**, 45-48, doi:10.1038/nmeth.4066 (2017).
- 372 30 Scheets, K. Maize chlorotic mottle machlomovirus expresses its coat protein from a 1.47-kb  
373 subgenomic RNA and makes a 0.34-kb subgenomic RNA. *Virology* **267**, 90-101,  
374 doi:10.1006/viro.1999.0107 (2000).
- 375 31 Smirnova, E. *et al.* Discovery of a Small Non-AUG-Initiated ORF in Poleroviruses and  
376 Luteoviruses That Is Required for Long-Distance Movement. *PLoS Pathog* **11**, e1004868,  
377 doi:10.1371/journal.ppat.1004868 (2015).
- 378 32 Ryabov, E. V. *et al.* Genus: Umbravirus. 1191-1195 (International Committee on Taxonomy of  
379 Viruses, 2012).
- 380 33 Stevens, M., Freeman, B., Liu, H. Y., Herrbach, E. & Lemaire, O. Beet poleroviruses: close  
381 friends or distant relatives? *Mol Plant Pathol* **6**, 1-9, doi:10.1111/j.1364-3703.2004.00258.x  
382 (2005).
- 383 34 Miller, W. A., Jackson, J. & Feng, Y. Cis- and trans-regulation of luteovirus gene expression by  
384 the 3' end of the viral genome. *Virus Res* **206**, 37-45, doi:10.1016/j.virusres.2015.03.009 (2015).
- 385 35 Miller, W. A. & White, K. A. Long-distance RNA-RNA interactions in plant virus gene  
386 expression and replication. *Annu Rev Phytopathol* **44**, 447-467,  
387 doi:10.1146/annurev.phyto.44.070505.143353 (2006).
- 388 36 Newburn, L. R. & White, K. A. Cis-acting RNA elements in positive-strand RNA plant virus  
389 genomes. *Virology* **479-480**, 434-443, doi:10.1016/j.virol.2015.02.032 (2015).
- 390 37 Johnston, J. C. & Rochon, D. M. Deletion analysis of the promoter for the cucumber necrosis  
391 virus 0.9-kb subgenomic RNA. *Virology* **214**, 100-109, doi:10.1006/viro.1995.9950 (1995).
- 392 38 Toor, N., Keating, K. S., Taylor, S. D. & Pyle, A. M. Crystal structure of a self-spliced group II  
393 intron. *Science* **320**, 77-82, doi:10.1126/science.1153803 (2008).



- 394 39 Okonechnikov, K., Golosova, O., Fursov, M. & team, U. Unipro UGENE: a unified  
395 bioinformatics toolkit. *Bioinformatics* **28**, 1166-1167, doi:10.1093/bioinformatics/bts091 (2012).  
396 40 Shi, M. *et al.* The evolutionary history of vertebrate RNA viruses. *Nature* **556**, 197-202,  
397 doi:10.1038/s41586-018-0012-7 (2018).  
398 41 Shi, M. *et al.* Redefining the invertebrate RNA virosphere. *Nature*, doi:10.1038/nature20167  
399 (2016).  
400 42 Weinberg, Z. & Breaker, R. R. R2R--software to speed the depiction of aesthetic consensus RNA  
401 secondary structures. *BMC Bioinformatics* **12**, 3, doi:10.1186/1471-2105-12-3 (2011).  
402 43 Leontis, N. B. & Westhof, E. The annotation of RNA motifs. *Comp Funct Genomics* **3**, 518-524,  
403 doi:10.1002/cfg.213 (2002).

404

405

406 **TABLE**

407 **Table 1.** Selected set of plant viruses possessing an xrRNA<sub>TL</sub>. Viruses are grouped by their genomic  
 408 context (last column). The complete list of sequences used for comparative sequence alignment is shown  
 409 in Table S1.

| Name                                                        | Abbreviation | Classification               | GenBank ID | Total ssRNA length (nt) | Genomic location* | Genomic context                                       |
|-------------------------------------------------------------|--------------|------------------------------|------------|-------------------------|-------------------|-------------------------------------------------------|
| Red clover necrotic mosaic virus                            | RCNMV        | Tombusviridae; Dianthovirus  | NC_003756  | 3890                    | 3461-3504         | 3' UTR                                                |
| Sweet clover necrotic mosaic virus                          | SCNMV        | Tombusviridae; Dianthovirus  | NC_003806  | 3876                    | 3446-3489         | 3' UTR                                                |
| Maize chlorotic mottle virus (isolate KS1)                  | MCMV         | Tombusviridae; Machlomovirus | NC_003627  | 4437                    | 4101-4143         | 3' UTR                                                |
| Opium poppy mosaic virus (isolate PHEL5235)                 | OPMV         | Tombusviridae; Umbravirus    | NC_027710  | 4230                    | 3585-3629         | 3' UTR                                                |
| Carrot mottle mimic umbravirus                              | CMoMV        | Tombusviridae; Umbravirus    | NC_001726  | 4201                    | 2664-2706         | 74 nt to AUG from ORF3                                |
| Chickpea chlorotic stunt virus                              | CpCSV        | Luteoviridae; Polerovirus    | NC_008249  | 5900                    | 3489-3534         | 11 nt to AUA from ORF3a;<br>129 nt to AUG from ORF3-5 |
| Cowpea polerovirus 1 (isolate BE167)                        | CpPV1        | Luteoviridae; Polerovirus    | NC_034246  | 5845                    | 3380-3425         | 11 nt to CUG from ORF3a;<br>129 nt to AUG from ORF3-5 |
| Cotton leafroll dwarf virus                                 | CoLRDV       | Luteoviridae; Polerovirus    | NC_014545  | 5866                    | 3451-3499         | 13 nt to CUG from ORF3a;<br>131 nt to AUG from ORF3-5 |
| Cereal yellow dwarf virus-RPV                               | CYDV-RPV     | Luteoviridae; Polerovirus    | NC_004751  | 5723                    | 3566-3622         | 14 nt to AUU from ORF3a;<br>132 nt to AUG from ORF3-5 |
| Maize yellow dwarf virus-RMV (Formerly BYDV)                | MYDV-RMV     | Luteoviridae; Polerovirus    | NC_021484  | 5612                    | 3335-3384         | 14 nt to ACG from ORF3a;<br>132 nt to AUG from ORF3-5 |
| Potato leafroll virus                                       | PLRV         | Luteoviridae; Polerovirus    | NC_001747  | 5987                    | 3509-3557         | 18 nt to AUA from ORF3a;<br>136 nt to AUG from ORF3-5 |
| Hubei polero-like virus 2 (strain QTM26674)                 | HuPLV2       | Unclassified                 | NC_033229  | 6083                    | 3706-3753         | 133 nt to AUG from ORF3-5                             |
| Beet western yellows luteovirus (strain bwv-1, isolate 28a) | BWVY         | Luteoviridae; Polerovirus    | L39983     | 973                     | 341-389           | 135 nt to AUG from ORF3-5                             |
| Hubei polero-like virus 1 (strain WHCC118254)               | HuPLV1       | Unclassified                 | NC_032224  | 4213                    | 3357-3410         | 135 nt to AUG from ORF3-5                             |
| Sugarcane yellow leaf virus                                 | ScYLV        | Luteoviridae; Polerovirus    | NC_000874  | 5899                    | 3467-3512         | 136 nt to AUG from ORF3-5                             |
| Beet western yellows virus                                  | BWVY         | Luteoviridae; Polerovirus    | NC_004756  | 5666                    | 3346-3393         | 138 nt to AUG from ORF3-5                             |

410

411 \*xrRNA boundaries defined as the 1<sup>st</sup> nucleotide of the P1 stem and the last nucleotide of the pseudoknot.

412 **FIGURES**

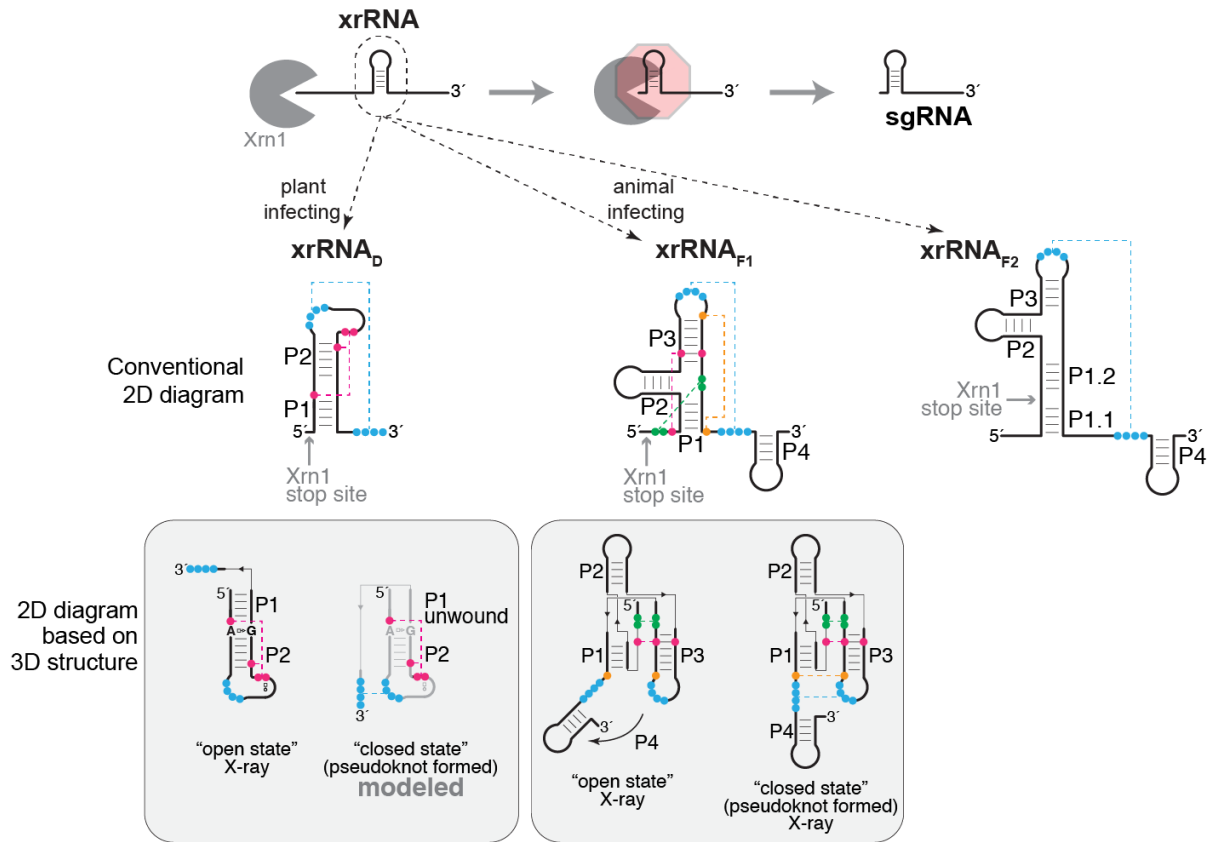

413

414 **Figure 1 | An expanding repertoire of structured RNAs for blocking exoribonuclease degradation.**  
 415 Top: xrRNAs adopt a three-dimensional structure that blocks the progression of 5' to 3' exoribonucleases  
 416 such as Xrn1 (grey). In the case of flaviviruses and dianthoviruses, xrRNAs are in the 3'UTR and this  
 417 results in accumulating sgRNAs that comprise the 3'UTR. Middle: Secondary structure diagrams are  
 418 shown for the two classes of xrRNAs from flaviviruses ( $xrRNA_{F1}$  and  $xrRNA_{F2}$ )<sup>15,24,25</sup>, and from  
 419 dianthoviruses ( $xrRNA_D$ )<sup>26</sup>. Secondary structure features are labeled, and nucleotides involved in tertiary  
 420 interactions are shown in colors connected by dashed lines (pseudoknot shown in blue). Experimentally  
 421 determined Xrn1 stop sites are indicated. Bottom: The grey shaded boxes below each secondary structure  
 422 contain diagrams reflecting the currently available three-dimensional structures<sup>22,23,26</sup>. The A8-G33 pair  
 423 is highlighted in the open state of the Sweet clover necrotic mosaic virus (SCNMV) xrRNA.

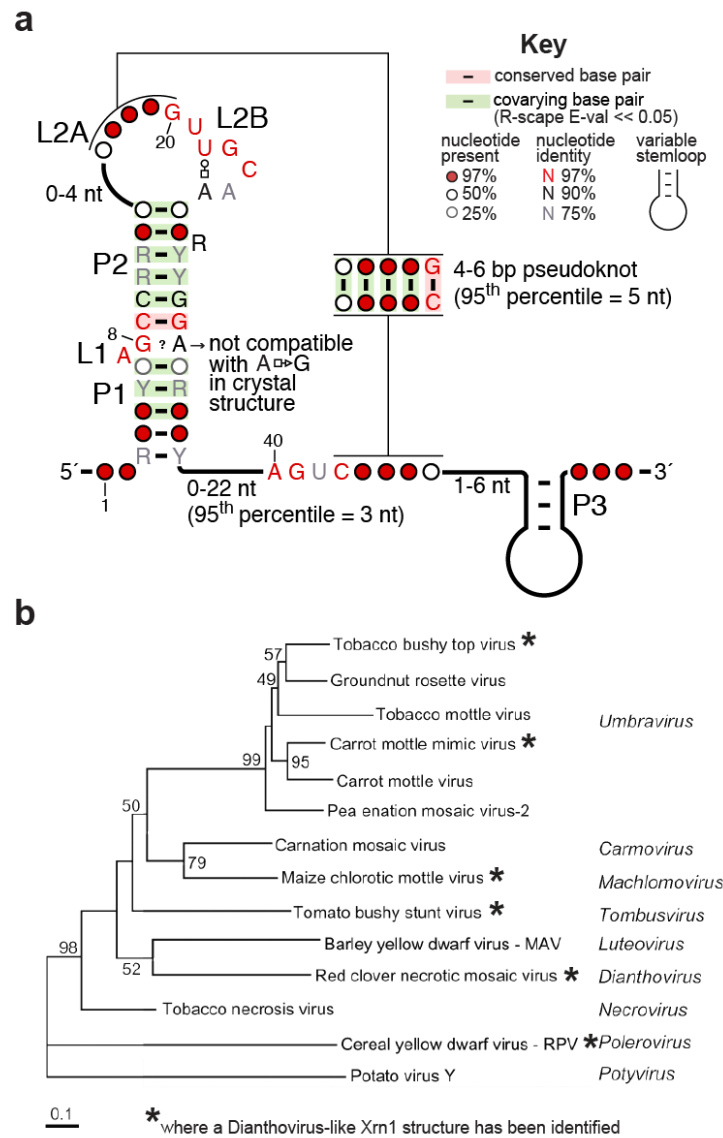

424

425 **Figure 2 | Widespread occurrence of Xrn1-resistant RNAs among plant viruses.** (a) Consensus  
 426 sequence and secondary structure of xrRNA<sub>TL</sub> based on a comparative sequence alignment of 47  
 427 sequences of viruses belonging to the *Tombusviridae* and *Luteoviridae* families (shown in Figure S1). Y =  
 428 pyrimidine; R = purine. Non-Watson-Crick base pairs are shown using the Leontis-Westhof nomenclature  
 429 <sup>43</sup>. The numbering is that of the crystal structure of the SCNMV xrRNA<sub>D</sub> (now referred to as xrRNA<sub>TL</sub>) <sup>26</sup>.  
 430 (b) Phylogenetic relationship between various plant viruses, based on the RNA-dependent RNA  
 431 polymerase amino acid sequence <sup>32</sup>. The viruses and corresponding genera in which we identified  
 432 xrRNA<sub>TL</sub> structures are marked by a star. Numbers at the nodes refer to bootstrap values as percentages  
 433 obtained from 2000 replications, shown only for branches supported by more than 40%. Branch length is  
 434 proportional to the number of changes. Additional analysis will likely reveal xrRNA<sub>TL</sub> elements in more  
 435 of these viruses with additional sequence and structural variation.

436

437

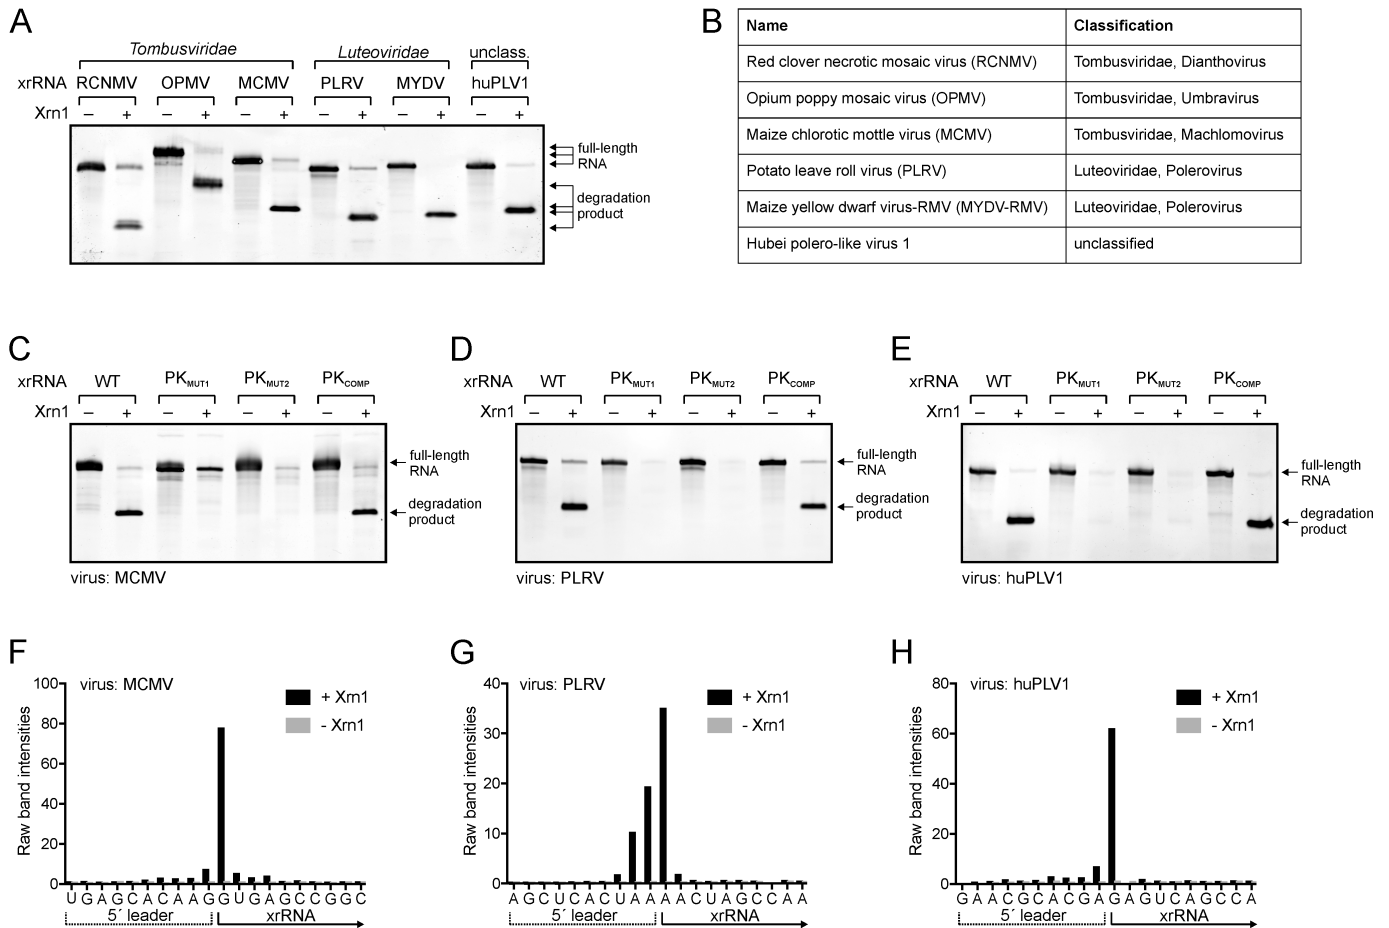

438

439

440 **Figure 3 | Biochemical characterization of representative plant virus xrRNA<sub>TL</sub> elements.** (A) *In vitro*  
 441 Xrn1 resistance assay of putative xrRNA<sub>TL</sub> from various plant RNA viruses (Table 1). The xrRNA from  
 442 RCNMV was included as a positive control. Arrows indicate the size of full-length RNA and Xrn1-  
 443 resistant degradation product. (B) Classification of viruses used in A (Table 1). (C-E) *In vitro* Xrn1  
 444 resistance assay of WT and PK mutant versions of MCMV (C), PLRV (D) and HuPLV1 (E) xrRNAs. (F-  
 445 H) Reverse transcription (RT) mapping of the Xrn1 halt site. Distribution of RT products of Xrn1-  
 446 resistant fragments of MCMV (F), PLRV (G) and HuPLV1 (H) degradation fragments. Experimentally  
 447 validated halt sites are indicated on the secondary structure diagram for all tested xrRNA<sub>TL</sub> in Figure S2.

448

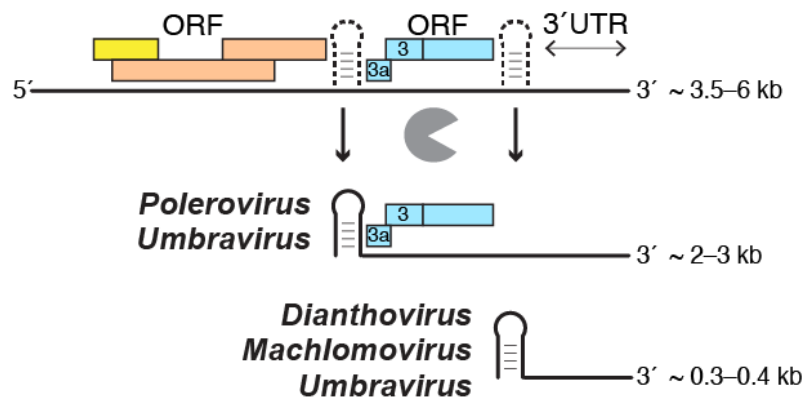

449

450 **Figure 4 | xrRNA<sub>TL</sub> can produce or protect both coding and noncoding sgRNAs.** The presence of  
451 xrRNA<sub>TL</sub> in different contexts suggests an expanded role for these elements. Shown here, full-length  
452 viral genomic RNA (top) could be processed by exonucleases that stop at xrRNAs (depicted as dashed  
453 structures) to yield both sgRNAs with protein coding potential (middle) and noncoding sgRNAs (bottom).  
454 Also, sgRNAs produced by subgenomic promoters could be “trimmed” or protected by xrRNAs (not  
455 shown). Note that only some *Umbraviruses* (e.g. OPMV) possess two xrRNA<sub>TL</sub> elements. Colored boxes  
456 symbolize ORF organization in the plant viruses examined in this study.

457
